# Supplementary material
Source: Springer Nature journal article supplement (https://www.springermedizin.de/resource/supplementary/12885_2013_4279_MOESM2_ESM.pdf/9467362)

PCA Mapping (28.2%)

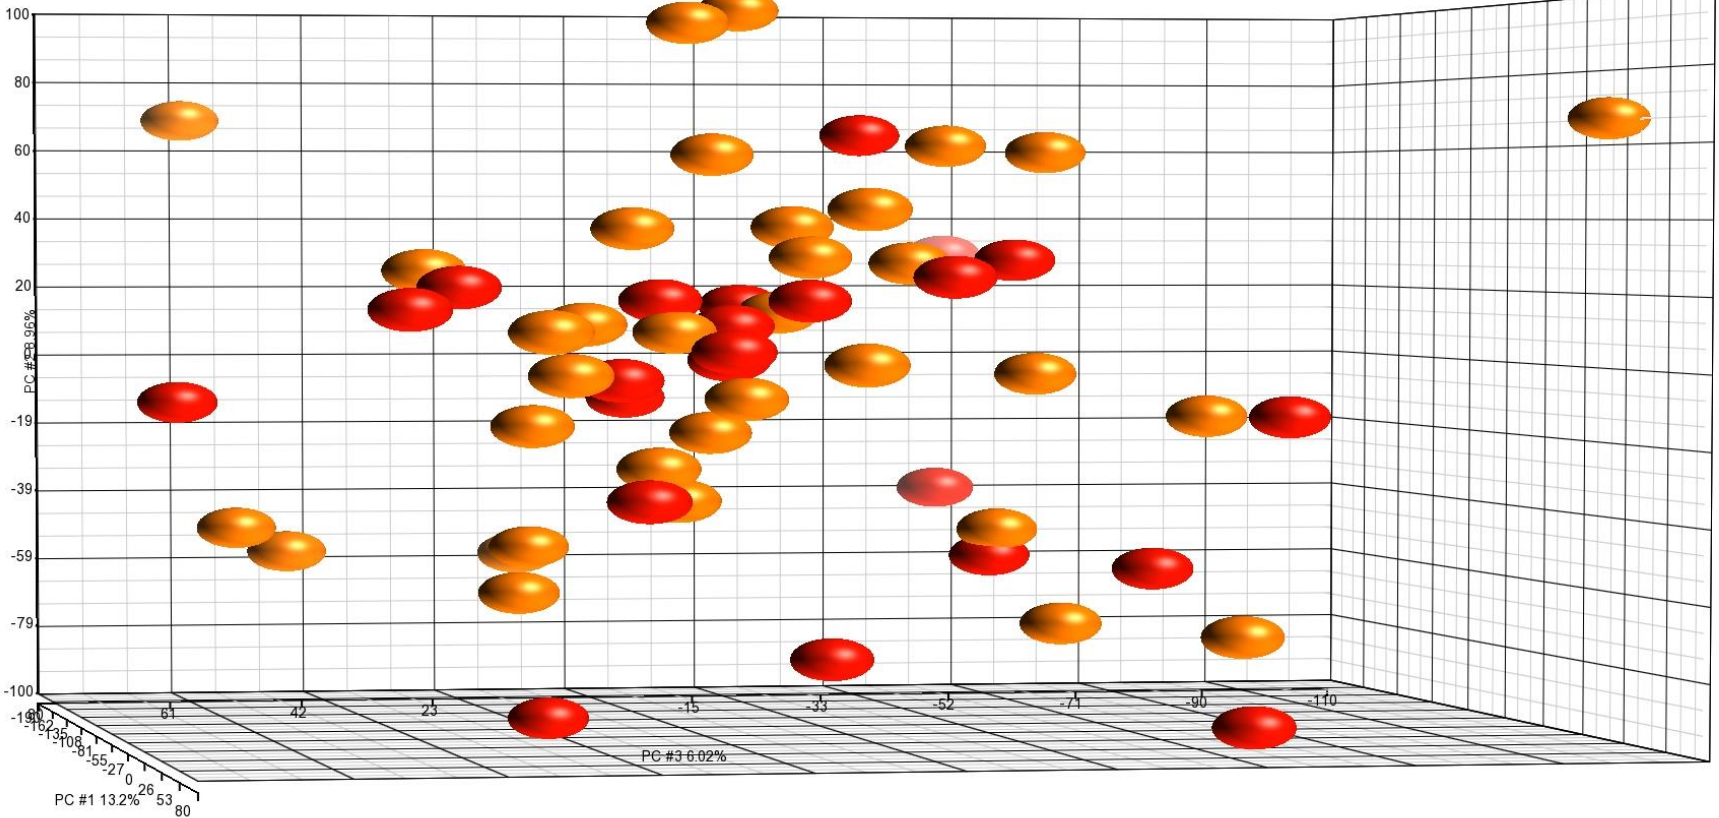

Supplement: MOESM2 [file 9467362]
